# Supplementary material for: δ-Lactones—A New Class of Compounds That Are Toxic to E. coli K12 and R2–R4 Strains
Source: Materials (Basel). 2021 May 30;14(11):2956. doi: 10.3390/ma14112956 (PMC8199173; doi:10.3390/ma14112956)
Supplement: Supplementary file 1 [file materials-14-02956-s001.zip › materials-1201923-supplementary.pdf]

# δ-Lactones—A New Class of Compounds That Are Toxic to *E. coli* K12 and R2–R4 Strains

Paweł Kowalczyk <sup>1,\*</sup>, Gawdzik Barbara <sup>2,\*</sup>, Damian Trzepizur <sup>3</sup>, Mateusz Szymczak <sup>4</sup>, Grzegorz Skiba <sup>1</sup>, Stanisława Raj <sup>1</sup>, Karol Kramkowski <sup>5</sup>, Rafał Lizut <sup>6</sup> and Ryszard Ostaszewski <sup>3</sup>

<sup>1</sup> Department of Animal Nutrition, The Kielanowski Institute of Animal Physiology and Nutrition, Polish Academy of Sciences, 05-110 Jabłonna, Poland; g.skiba@ifzz.pl (G.S.); s.raj@ifzz.pl (S.R.)

<sup>2</sup> Institute of Chemistry, Jan Kochanowski University, Świętokrzyska 15 G, 25-406 Kielce, Poland

<sup>3</sup> Institute of Organic Chemistry PAS, Kasprzaka 44/52, 01-224 Warsaw, Poland; damian.trzepizur@icho.edu.pl

<sup>4</sup> Department of Molecular Virology, Institute of Microbiology, Faculty of Biology, University of Warsaw, Miecznikowa 1, 02-096 Warsaw, Poland; mszymczak@biol.uw.edu.pl

<sup>5</sup> Department of Physical Chemistry, Medical University of Białystok, Kilińskiego 1 str, 15-089 Białystok, Poland; kkramk@wp.pl

<sup>6</sup> The John Paul II Catholic University of Lublin, Institute of Mathematics, Informatics and Landscape Architecture ul. Konstantynów 1 H, 20-708 Lublin, Poland; lizut@kul.pl

\* Correspondence: p.kowalczyk@ifzz.pl (P.K.); b.gawdzik@ujk.edu.pl (G.B.)

**Citation:** Kowalczyk, P.; Trzepizur, D.; Szymczak, M.; Skiba, G.; Kramkowski, K.; Ostaszewski, R. δ-Lactones—A New Class of Compounds That are Toxic to *E. coli* K12 and R2–R4 Strains. *Materials* **2021**, *14*, 2956. <https://doi.org/10.3390/ma14112956>

Academic Editors: Francesco Baino and John T. Kiwi

Received: 13 April 2021

Accepted: 27 May 2021

Published: 30 May 2021

**Publisher's Note:** MDPI stays neutral with regard to jurisdictional claims in published maps and institutional affiliations.

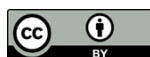

**Copyright:** © 2021 by the authors. Licensee MDPI, Basel, Switzerland. This article is an open access article distributed under the terms and conditions of the Creative Commons Attribution (CC BY) license (<https://creativecommons.org/licenses/by/4.0/>).

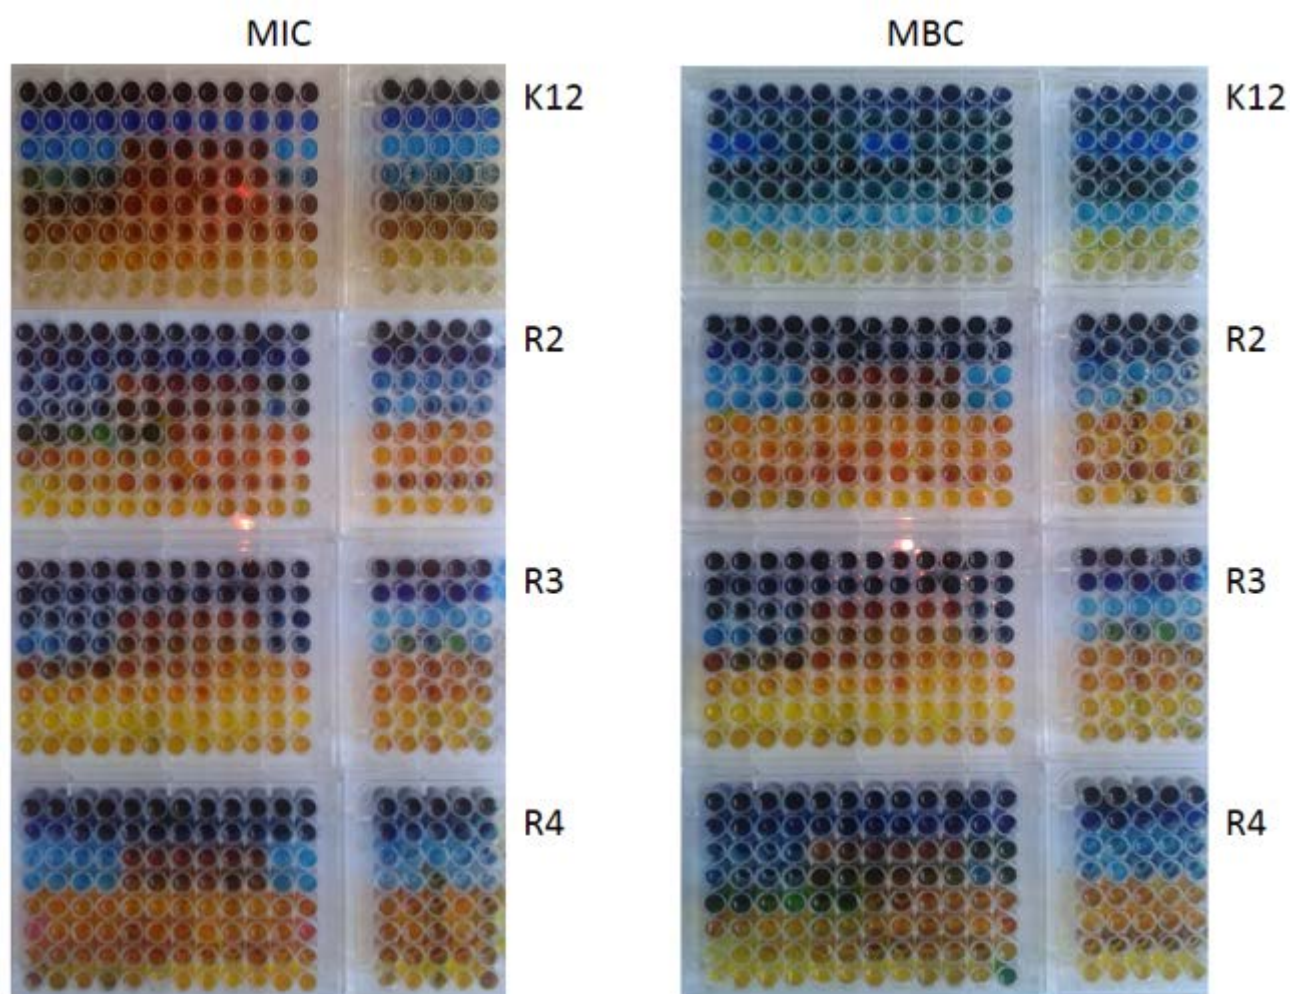

**Figure S1.** Examples of MIC and MBC on microplates with different concentration of studied compounds (mg L<sup>-1</sup>). Resazurin was added as an indicator of microbial growth with K12, R2, R3 and R4 strains with tested 17 compounds. as described in Table 1.

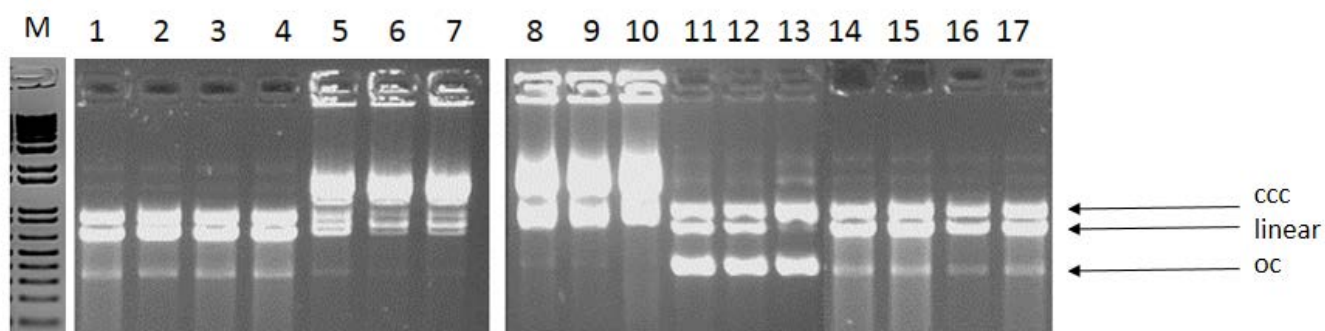

**Figure S2.** An example of an agarose gel electrophoresis separation of isolated plasmids DNA on R4 strains modified with selected lactones from 1-17 as described in Table 1

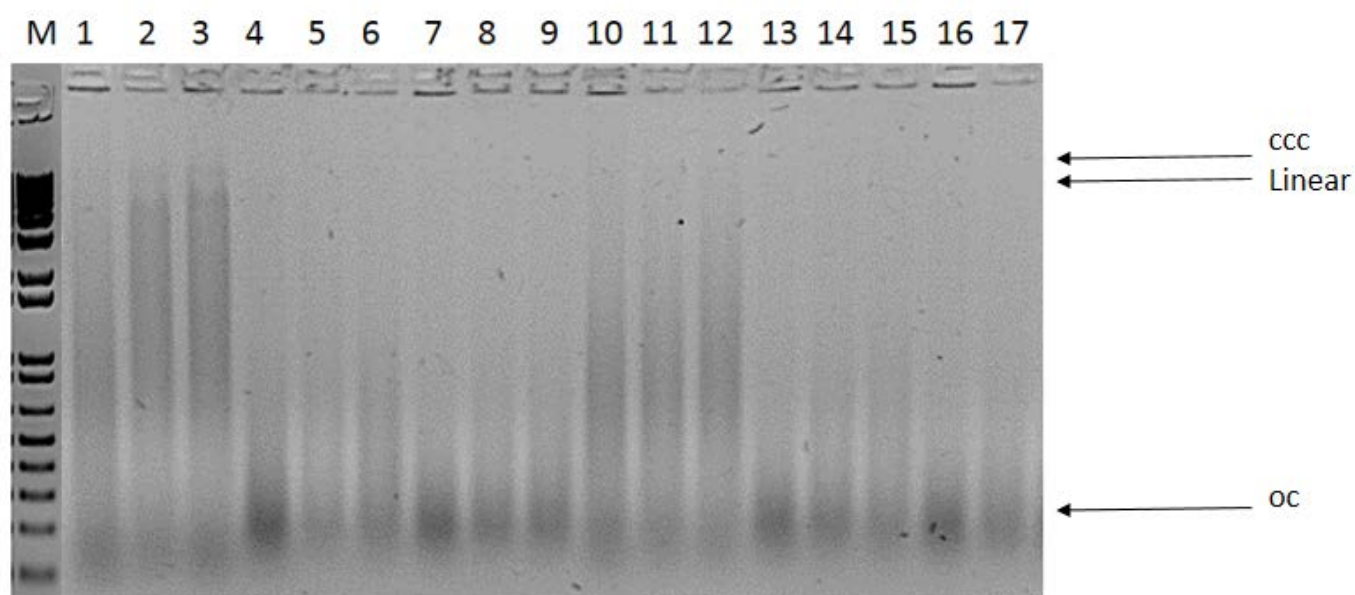

**Figure S3.** An example of an agarose gel electrophoresis separation of isolated plasmids DNA on R4 strains modified with selected lactones from 1-17 as described in Table 1, digested with repair Fpg protein.

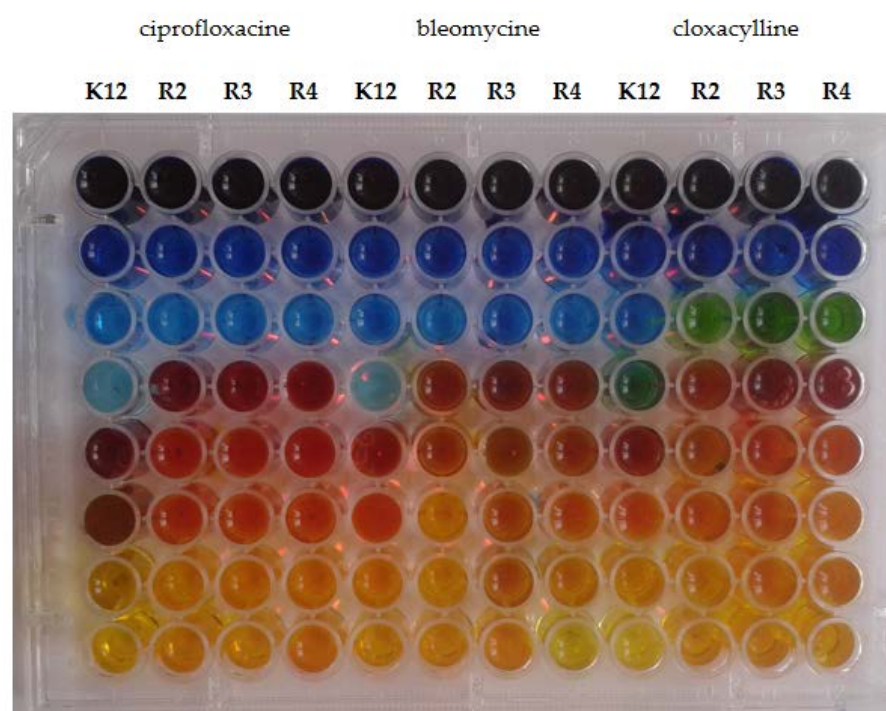

**Figure S4.** Examples of MIC with different strains K12, R2, R3, R4 of studied antibiotics with ciprofloxacin, bleomycin, cloxacillin.

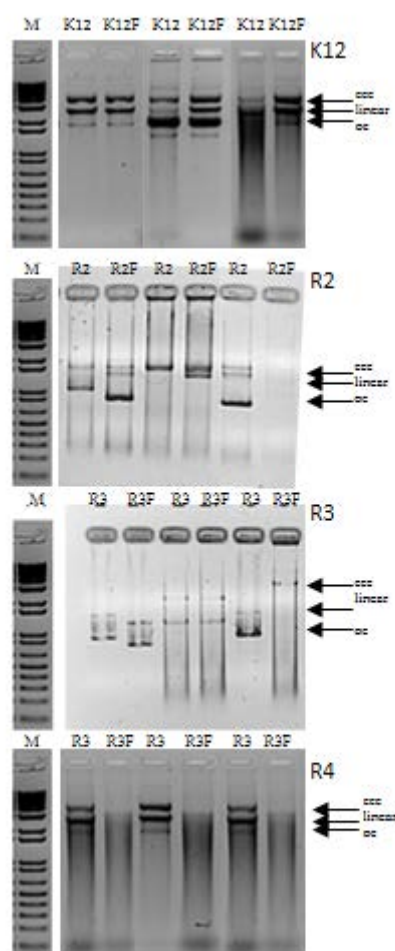

**Figure S5.** An example of an agarose gel electrophoresis separation of isolated plasmids DNA from K12, R2, R4 and R4 strains modified with antibiotics : ciprofloxacin, bleomycin and cloxacillin digested (or not) with repair enzymes Fpg.
